# Supplementary material for: Usability and motivational impact of a fast-paced immersive virtual-reality lecture on international middle-school students in geoscience education
Source: Copernicus journal article supplement (doi:10.5194/gc-8-197-2025), 2025-08-07
Supplement: Supplementary file 1 [file gc-8-197-2025-supplement.zip]

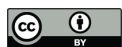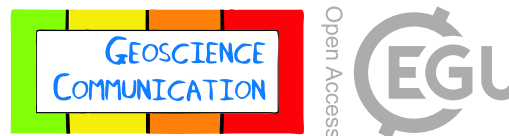

## *Supplement of*

# **Usability and motivational impact of a fast-paced immersive virtual-reality lecture on international middle-school students in geoscience education**

**Azim Zulhilmi et al.**

*Correspondence to:* Azim Zulhilmi (Azimzulhilmi@ees.hokudai.ac.jp)

- gc-8-197-2025-supplement-title-page.pdf
- Supplementary Materials (Expanded Data).xlsx
- Supplementary Materials (Survey).docx

The copyright of individual parts of the supplement might differ from the article licence.
