# Supplementary material for: Usability and motivational impact of a fast-paced immersive virtual-reality lecture on international middle-school students in geoscience education
Source: Copernicus journal article supplement (doi:10.5194/gc-8-197-2025), 2025-08-07
Supplement: Supplementary file 1 [file gc-8-197-2025-supplement.zip]

## Sheet: Table S1 - VR Usability
	No	Category	VR Usability Item	G6 Score	SD	G6 Verdict	G7 Score	SD	G7 Verdict	G8 Score	SD	G8 Verdict	Overall Score (1-5)	SD	Overall Verdict
	1	Discomfort	I felt some discomfort (e.g. sickness, eyestrain, etc.)	2.13	1.31	Disagree	2.45	1.28	Disagree	2.06	1	Disagree	2.22	1.19	Disagree
	2	Effectiveness	It was easy to use and navigate in VR experience	4.06	1.12	Agree	4.25	0.64	Strongly Agree	4.06	0.73	Agree	4.13	0.83	Agree
	3		VR helped me understand the landslides and research work conducted in Atsuma better	3.63	0.96	Agree	4.1	0.79	Agree	3.89	0.68	Agree	3.89	0.82	Agree
	4	Satisfaction	I liked the VR experience	4.6	1.06	Strongly Agree	4.58	0.61	Strongly Agree	4.38	0.62	Strongly Agree	4.52	0.76	Strongly Agree
	5		I was very satisfied with the VR experience	4.13	1.45	Agree	4.55	0.6	Strongly Agree	4.39	0.7	Strongly Agree	4.37	0.96	Strongly Agree
	6		I would recommend the VR activity to other students	4.31	1.2	Strongly Agree	4.55	0.69	Strongly Agree	4.47	0.62	Strongly Agree	4.45	0.85	Strongly Agree
	7	Immersion	I wanted to continue the VR activity beyond the time limit	4.13	1.5	Agree	3.95	1.05	Agree	4.17	0.79	Agree	4.07	1.11	Agree
	8		During the VR activity, it felt like I was really there	3.88	1.26	Agree	4.05	0.83	Agree	3.76	0.75	Agree	3.91	0.95	Agree
	9	Accessibility	The VR application provided sufficient help and support	3.38	0.72	Neutral	4.2	0.89	Agree	3.94	0.64	Agree	3.87	0.83	Agree
	10		I easily understood how to use the features of VR regardless of prior VR experience	4.19	1.28	Agree	4.25	1.07	Strongly Agree	4.11	0.68	Agree	4.19	1.01	Agree
	Note. These are non-reversed coded data

## Sheet: Table S2 - VR Motivation
	No	Category	Virtual Reality (VR) Motivational Survey Item	G6 Score	SD	G6 Verdict	G7 Score	SD	G7 Verdict	G8 Score	SD	G8 Verdict	Overall Score (1-7)	SD	Overall Verdict
	1	Interest/ Enjoyment	The VR activity was fun & entertaining	5.81	2.17	Agree	6.45	0.76	Strongly Agree	6.35	0.79	Strongly Agree	6.23	1.35	Strongly Agree
	2		The VR activity was enjoyable & satisfying	5.69	1.99	Agree	6.4	0.75	Strongly Agree	6.24	0.97	Strongly Agree	6.13	1.32	Agree
	3		The VR activity was interesting & appealing	5.63	1.75	Agree	6.4	0.68	Strongly Agree	6.41	0.62	Strongly Agree	6.17	1.14	Strongly Agree
	4	Perceived Competence	I understood majority of the VR session	3.94	1.53	Neutral	5.95	0.94	Agree	5.65	0.93	Agree	5.25	1.43	Slightly Agree
	5		I felt I performed better than my peers	4.38	1.67	Neutral	4.6	1.5	Slightly Agree	4.65	1.17	Slightly Agree	4.55	1.44	Slgihtly Agree
	6		I felt more confident and capable about my newly acquired knowledge after the VR activity	4.5	1.46	Slightly Agree	5.55	1.15	Agree	5.18	1.13	Slightly Agree	5.11	1.3	Slightly Agree
	7	Perceived Choice	I was involved with the VR activity because I wanted to	5.81	1.76	Agree	5.65	1.18	Agree	5.39	1.14	Agree	5.61	1.35	Agree
	8		I felt I had some freedom of choice during the VR activity	5.06	2.08	Slightly Agree	5.9	1.25	Agree	5.12	1.17	Slightly Agree	5.4	1.55	Agree
	9	Effort/ Importance	I had to put a lot of effort during the VR activity	3.81	1.76	Neutral	4.25	1.59	Neutral	4	1.57	Neutral	4.04	1.61	Neutral
	10		It is important to me to do well during the VR activity	4.88	1.41	Slightly Agree	5.15	1.6	Slightly Agree	4.67	1.41	Slightly Agree	4.91	1.47	Slightly Agree
	11	Pressure/ Tension	The VR activity felt tense	3.88	2.33	Neutral	2.85	2.06	Slightly Disagree	3.11	1.57	Slightly Disagree	3.24	2.01	Slightly Disagree
	12		I felt anxious during the VR activity	3.13	2.06	Slightly Disagree	2.45	1.67	Disagree	3.28	1.78	Slightly Disagree	2.93	1.83	Slightly Disagree
	13	Value/ Usefulness	The VR activity will value me in the future	4.94	1.95	Slightly Agree	5.45	1.32	Agree	5	1.19	Slightly Agree	5.15	1.48	Slightly Agree
	14		The VR session is useful for my geological knowledge	5.06	1.24	Slightly Agree	5.8	1.06	Agree	5.44	1.04	Agree	5.46	1.13	Agree
	15		This VR experience improved my motivation in Geology	4.44	1.82	Slightly Agree	5.6	1.1	Agree	5.11	1.18	Slightly Agree	5.09	1.43	Slightly Agree
	Note. These are non-reversed coded data

## Sheet: Table S3 - VR +
	VR Lecture Positive Traits (Open Comments)
	Grade 6
	Category	Total coded from each response
	Engagement	6
	Immersion	2
	Content	4
	Technology	1
	Novelty	0
	Accessibility	4
	Interaction	2
	Grade 7
	Category	Total coded from each response
	Engagement	15
	Immersion	2
	Content	3
	Technology	4
	Novelty	3
	Accessibility	0
	Interaction	0
	Grade 8
	Category	Total coded from each response
	Engagement	11
	Immersion	4
	Content	4
	Technology	2
	Novelty	0
	Accessibility	0
	Interaction	0
	Grade	Number of student that responded
	6	12
	7	19
	8	16
	Total	47

## Sheet: Table S4 - VR -
	VR Lecture Negative Traits (Open Comments)
	Grade 6
	Category	Total coded from response
	Technical Issues	5
	Discomfort	2
	Insufficient Content	1
	Inaccessibility	1
	Time	1
	Management	0
	Grade 7
	Category	Total coded from response
	Technical Issues	2
	Discomfort	3
	Content	1
	Inaccessibility	1
	Time	1
	Management	4
	Grade 8
	Category	Total coded from response
	Technical Issues	6
	Discomfort	2
	Content	1
	Inaccessibility	3
	Time	0
	Management	1
	Respondents	Number of student that responded
	Grade 6	9
	Grade 7	10
	Grade 8	11
	Total	30

## Sheet: Table S5 - L Motivation
	No	Category	Lecture (L) Motivational Survey Item	G6 Score	SD	G6 Verdict	G7 Score	SD	G7 Verdict	G8 Score	SD	G8 Verdict	Overall Score (1-7)	SD	Overall Verdict
	1	Interest/ Enjoyment	The lecture was fun & entertaining	5.44	1.15	Agree	5.35	1.35	Agree	5.11	1.63	Slightly Agree	5.3	1.38	Agree
	2		The lecture was enjoyable & satisfying	5.33	1.19	Agree	5.42	1.02	Agree	5.16	1.71	Slightly Agree	5.3	1.32	Agree
	3		The lecture was interesting & appealing	5.61	1.33	Agree	5.79	1.23	Agree	5.32	1.6	Agree	5.57	1.39	Agree
	4	Perceived Competence	I understood majority of the lecture	5.22	1.73	Slightly Agree	5.05	0.94	Slightly Agree	4.79	1.55	Slightly Agree	5.02	1.42	Slightly Agree
	5		I felt I performed better than my peers	4.5	1.54	Slightly Agree	4.15	0.88	Neutral	3.89	1.37	Neutral	4.18	1.28	Neutral
	6		I felt more confident and capable about my newly acquired knowledge after the lecture	4.67	1.68	Slightly Agree	5.2	1.44	Slightly Agree	4.53	1.39	Slightly Agree	4.81	1.51	Slightly Agree
	7	Perceived Choice	I was involved with the lecture because I wanted to	5.06	0.94	Slightly Agree	4.7	1.34	Slightly Agree	4.63	1.3	Slightly Agree	4.79	1.21	Slightly Agree
	8		I felt I had some freedom of choice during the lecture	5	1.24	Slightly Agree	5.35	1.04	Agree	4.42	0.84	Neutral	4.93	1.1	Slightly Agree
	9	Effort/ Importance	I had to put a lot of effort during the lecture	3.44	1.58	Slightly Disagree	3.9	1.65	Neutral	4.42	1.12	Neutral	3.93	1.5	Neutral
	10		It is important to me to do well during the lecture	5.28	1.49	Slightly Agree	5	1.17	Slightly Agree	4.21	1.27	Neutral	4.82	1.36	Slightly Agree
	11	Pressure/ Tension	The lecture felt tense	3.72	1.9	Neutral	2.4	1.35	Disagree	3.26	1.41	Slightly Disagree	3.11	1.63	Slightly Disagree
	12		I felt anxious during the lecture	3.11	1.81	Slightly Disagree	2.1	1.02	Disagree	2.95	1.47	Slightly Disagree	2.7	1.5	Disagree
	13	Value/ Usefulness	The lecture will value me in the future	5.39	1.38	Agree	5.05	1.28	Slightly Agree	4.63	1.77	Slightly Agree	5.02	1.49	Slightly Agree
	14		The lecture is useful for my geological knowledge	5.61	1.54	Agree	5.8	1.11	Agree	5.26	1.41	Slightly Agree	5.56	1.35	Agree
	15		This lecture improved my motivation in Geology	5.17	1.69	Slightly Agree	4.85	1.42	Slightly Agree	4.84	1.8	Slightly Agree	4.95	1.62	Slightly Agree
	Note. These are non-reversed coded data

## Sheet: Table S6 - L +
	Lecture Positive Traits (Open Comments)
	Grade 6
	Category	Total coded from each response
	Engagement	10
	Accessibility	5
	Content	6
	Value	1
	Interaction	0
	Grade 7
	Category	Total coded from each response
	Engagement	5
	Accessibility	2
	Content	12
	Value	2
	Interaction	1
	Grade 8
	Category	Total coded from each response
	Engagement	2
	Accessibility	3
	Content	10
	Value	1
	Interaction	2
	Grade	Number of student that responded
	Grade 6	15
	Grade 7	14
	Grade 8	16
	Total	45

## Sheet: Table S7 - L -
	Lecture Negative Traits (Open Comments)
	Grade 6
	Category	Total coded from each response
	Inaccessibility	7
	Content	2
	Poor Engagement	1
	Time	0
	Grade 7
	Category	Total coded from each response
	Inaccessibility	5
	Content	1
	Poor Engagement	4
	Time	0
	Grade 8
	Category	Total coded from each response
	Inaccessibility	1
	Content	1
	Poor Engagement	5
	Time	2
	Grade	Number of student that responded
	Grade 6	8
	Grade 7	9
	Grade 8	9
	Total	26

## Sheet: Table S8 - HO Motivation
	No	Category	Hands-on (HO) Motivational Survey Item	G6 Score	SD	G6 Verdict	G7 Score	SD	G7 Verdict	G8 Score	SD	G8 Verdict	Overall Score (1-7)	SD	Overall Verdict
	1	Interest/ Enjoyment	The HO activity was fun & entertaining	5.47	1.42	Agree	5.8	1.01	Agree	5.11	1.1	Slightly Agree	5.46	1.19	Agree
	2		The HO activity was enjoyable & satisfying	5.24	1.6	Slightly Agree	5.45	1.1	Agree	5.11	1.1	Slightly Agree	5.27	1.26	Slightly Agree
	3		The HO activity was interesting & appealing	5.47	1.55	Agree	5.95	1.1	Agree	5	1.37	Slightly Agree	5.48	1.37	Agree
	4	Perceived Competence	I understood majority of the HO session	5.47	1.42	Agree	5.4	1.05	Agree	5.05	0.97	Slightly Agree	5.3	1.14	Agree
	5		I felt I performed better than my peers	4.82	1.51	Slightly Agree	4.2	0.95	Neutral	4.22	1.06	Neutral	4.4	1.2	Neutral
	6		I felt more confident and capable about my newly acquired knowledge after the HO activity	5.24	1.44	Slightly Agree	5.25	1.29	Slightly Agree	4.89	1.05	Slightly Agree	5.13	1.25	Slightly Agree
	7	Perceived Choice	I was involved with the HO activity because I wanted to	5.12	1.54	Slightly Agree	5.25	1.48	Slightly Agree	4.06	0.66	Neutral	4.83	1.38	Slightly Agree
	8		I felt I had some freedom of choice during the HO activity	4.81	1.56	Slightly Agree	5.7	1.08	Agree	4.29	0.69	Neutral	4.98	1.28	Slightly Agree
	9	Effort/ Importance	I had to put a lot of effort during the HO activity	4.24	1.75	Neutral	3.85	1.66	Neutral	3.8	1.26	Neutral	3.96	1.57	Neutral
	10		It is important to me to do well during the HO activity	5.44	1.46	Agree	5	1.56	Slightly Agree	4.53	1.46	Slightly Agree	5	1.51	Slightly Agree
	11	Pressure/ Tension	The HO activity felt tense	3.65	1.87	Neutral	2.35	1.35	Disagree	3.47	1.51	Slightly Disagree	3.1	1.66	Slightly Disagree
	12		I felt anxious during the HO activity	4	2.25	Neutral	2	1.08	Disagree	3.53	1.68	Slightly Disagree	3.08	1.89	Slightly Disagree
	13	Value/ Usefulness	The HO activity will value me in the future	5.59	1.18	Agree	5.16	1.12	Slightly Agree	4.36	0.74	Neutral	5.08	1.14	Slightly Agree
	14		The HO session is useful for my geological knowledge	5.41	1.18	Agree	5.63	0.96	Agree	5.29	0.99	Slightly Agree	5.46	1.03	Agree
	15		This HO experience improved my motivation in Geology	5.18	1.38	Slightly Agree	5.26	1.05	Slightly Agree	4.71	0.83	Slightly Agree	5.08	1.12	Slightly Agree
	Note. These are non-reversed coded data

## Sheet: Table S9 - HO +
	Hands-on Positive Traits (Open Comments)
	Grade 6
	Category	Total coded from each response
	Engagement	7
	Value	1
	Content	5
	Accessibility	0
	Technology	5
	Interaction	5
	Grade 7
	Category	Total coded from each response
	Engagement	5
	Value	0
	Content	12
	Accessibility	2
	Technology	5
	Interaction	4
	Grade 8
	Category	Total coded from each response
	Engagement	0
	Value	0
	Content	5
	Accessibility	0
	Technology	0
	Interaction	1
	Grade	Number of student that responded
	Grade 6	13
	Grade 7	18
	Grade 8	6
	Total	37

## Sheet: Table S10 - HO -
	Hands-on Negative Traits (Open Comments)
	Grade 6
	Category	Total coded from each response
	Poor engagement	3
	Inaccessibility	2
	Content	0
	Grade 7
	Category	Total coded from each response
	Poor engagement	0
	Inaccessibility	6
	Content	1
	Grade 8
	Category	Total coded from each response
	Poor engagement	1
	Inaccessibility	0
	Content	0
	Respondents	Number of student that responded
	Grade 6	5
	Grade 7	7
	Grade 8	1
	Total	13
